# Supplementary material for: Tracking Rift Valley fever: From Mali to Europe and other countries, 2016
Source: PubMed Central journal article supplement (PMC6446957; doi:10.2807/1560-7917.es.2019.24.8.1800213), 2019-02-21
Supplement: 18-00213_POMMIER_Supplement.pdf [file 18-00213_POMMIER_Supplement.pdf]

## Supplement: Questionnaire administered for Rift Valley fever investigation, Mali-France, 2016

This supplementary material is hosted by Eurosurveillance as supporting information alongside the article [Tracking Rift Valley fever: From Mali to Europe and other countries, 2016] on behalf of the authors who remain responsible for the accuracy and appropriateness of the content. The same standards for ethics, copyright, attributions and permissions as for the article apply.

### A) Preceding exposures to Rift Valley Fever Virus

Have you ever been on a trip or on military deployment to Africa or Middle East before?

No     Yes

### B) Stay in Mali

Arrival in Mali

|  |  |   |  |  |   |  |  |  |  |
|--|--|---|--|--|---|--|--|--|--|
|  |  | / |  |  | / |  |  |  |  |
|--|--|---|--|--|---|--|--|--|--|

Departure in Mali

|  |  |   |  |  |   |  |  |  |  |
|--|--|---|--|--|---|--|--|--|--|
|  |  | / |  |  | / |  |  |  |  |
|--|--|---|--|--|---|--|--|--|--|

From september to your departure, did you stay at Abeibara?

No     Yes

From september to your departure, did you stay in another location in Mali ?

No     Yes

If yes, which ones?

Location 1 

|  |  |  |  |  |  |  |  |  |  |  |  |  |  |  |  |  |  |  |  |
|--|--|--|--|--|--|--|--|--|--|--|--|--|--|--|--|--|--|--|--|
|  |  |  |  |  |  |  |  |  |  |  |  |  |  |  |  |  |  |  |  |
|--|--|--|--|--|--|--|--|--|--|--|--|--|--|--|--|--|--|--|--|

Location 3 

|  |  |  |  |  |  |  |  |  |  |  |  |  |  |  |  |  |  |  |  |
|--|--|--|--|--|--|--|--|--|--|--|--|--|--|--|--|--|--|--|--|
|  |  |  |  |  |  |  |  |  |  |  |  |  |  |  |  |  |  |  |  |
|--|--|--|--|--|--|--|--|--|--|--|--|--|--|--|--|--|--|--|--|

Location 2 

|  |  |  |  |  |  |  |  |  |  |  |  |  |  |  |  |  |  |  |  |
|--|--|--|--|--|--|--|--|--|--|--|--|--|--|--|--|--|--|--|--|
|  |  |  |  |  |  |  |  |  |  |  |  |  |  |  |  |  |  |  |  |
|--|--|--|--|--|--|--|--|--|--|--|--|--|--|--|--|--|--|--|--|

Location 4 

|  |  |  |  |  |  |  |  |  |  |  |  |  |  |  |  |  |  |  |  |
|--|--|--|--|--|--|--|--|--|--|--|--|--|--|--|--|--|--|--|--|
|  |  |  |  |  |  |  |  |  |  |  |  |  |  |  |  |  |  |  |  |
|--|--|--|--|--|--|--|--|--|--|--|--|--|--|--|--|--|--|--|--|

### C) Health status

From september to your departure, did you have any of these following symptoms?

Fever or fever feeling (episode 1)     No     Yes    If yes, when? 

|  |  |  |  |  |  |  |  |
|--|--|--|--|--|--|--|--|
|  |  |  |  |  |  |  |  |
|--|--|--|--|--|--|--|--|

Fever or fever feeling (episode 2)     No     Yes    If yes, when? 

|  |  |  |  |  |  |  |  |
|--|--|--|--|--|--|--|--|
|  |  |  |  |  |  |  |  |
|--|--|--|--|--|--|--|--|

Headache     No     Yes

Vision trouble     No     Yes

Retro-orbital pain     No     Yes

Diarrhea     No     Yes

Arthralgia     No     Yes

Vomiting     No     Yes

Myalgia     No     Yes

Colored urine     No     Yes

Nose/gums bleeding     No     Yes

Other symptoms     No     Yes

If other symptoms, which ones? 

|  |  |  |  |  |  |  |  |  |  |  |  |  |  |  |  |  |  |  |  |  |
|--|--|--|--|--|--|--|--|--|--|--|--|--|--|--|--|--|--|--|--|--|
|  |  |  |  |  |  |  |  |  |  |  |  |  |  |  |  |  |  |  |  |  |
|  |  |  |  |  |  |  |  |  |  |  |  |  |  |  |  |  |  |  |  |  |

If you had some symptoms, did you seek for medical care?

No     Yes

Did anyone else in your unit have similar symptoms at the same time?

No     Yes    If yes, how many? 

|  |  |
|--|--|
|  |  |
|--|--|

**D) Exposures to Rift Valley Fever Virus**

If you had a least one symptom during september to your departure, please answer the following questions:

**During the 10 days before your symptom(s)**

Did you see any animals (sheeps, goats, zebus, camels,...)  No  Yes

If yes, which animal(s)?

Where were they?

Around the camp  Inside the camp  Other location

Around the camp  Inside the camp  Other location

Around the camp  Inside the camp  Other location

Did you pet/touch/handle an animal?  No  Yes

If yes, which animal(s)?

Were they dead or alive?

dead  alive

dead  alive

dead  alive

Did you participate in the slaughter of a local animal?  No  Yes

If yes, which animal(s)?

Did you drink any local milk?  No  Yes

If yes, from which animal(s)?

Did you boil it before drinking?

No  Yes

No  Yes

No  Yes

Did you eat any local meat?  No  Yes

If yes, from which animal(s)?

How was the cooking?

rare  medium  well-done

rare  medium  well-done

rare  medium  well-done

Were you bitten by mosquitoes?  No  Yes

If yes, how often?  1-2 bites/day  
 3-5 bites/day  
 5-10 bites/day  
 >10 bites/day

when?  mostly during the day  
 mostly during the evening  
 all day long

Were you bitten by other insects?  No  Yes

If yes, which ones?

Did you clean or sleep in a place which hosted some animals?  No  Yes

Did you provide care to a wounded person?  No  Yes

**For everybody, during september to your departure:**

Did you see any animals (sheeps, goats, zebus, camels,...)  No  Yes

If yes, which animal(s)?

Where were they?

Around the camp

Inside the camp

Other location

Around the camp

Inside the camp

Other location

Around the camp

Inside the camp

Other location

Did you pet/touch/handle an animal?  No  Yes

If yes, which animal(s)?

Were they dead or alive?

dead  alive

dead  alive

dead  alive

Did you participate in the slaughter of a local animal?  No  Yes

If yes, which animal(s)?

Did you drink any local milk?  No  Yes

If yes, from which animal(s)?

Did you boil it before drinking?

No  Yes

No  Yes

No  Yes

Did you eat any local meat?  No  Yes

If yes, from which animal(s)?

How was the cooking?

rare  medium  well-done

rare  medium  well-done

rare  medium  well-done

Were you bitten by mosquitoes?  No  Yes

If yes, how often?  1-2 bites/day

when?  mostly during the day

3-5 bites/day

mostly during the evening

5-10 bites/day

all day long

>10 bites/day

Were you bitten by other insects?  No  Yes

If yes, which ones?

Did you clean or sleep in a place which hosted some animals?  No  Yes

Did you provide care to a wounded person?  No  Yes
